# Supplementary material for: Rainfall drives atmospheric ice-nucleating particles in the coastal climate of southern Norway
Source: Copernicus journal article supplement (doi:10.5194/acp-17-11065-2017), 2017-09-19
Supplement: Supplementary file 1 [file acp-17-11065-2017-supplement.zip]

Archive with 2 entries (2 files):
- acp-17-11065-2017-supplement-title-page.pdf
- Supplement.xls
