# Supplementary material for: Rainfall drives atmospheric ice-nucleating particles in the coastal climate of southern Norway
Source: Copernicus journal article supplement (doi:10.5194/acp-17-11065-2017), 2017-09-19
Supplement: Supplementary file 1 [file acp-17-11065-2017-supplement.zip › acp-17-11065-2017-supplement-title-page.pdf]

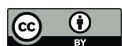

*Supplement of*

## **Rainfall drives atmospheric ice-nucleating particles in the coastal climate of southern Norway**

**Franz Conen et al.**

*Correspondence to:* Franz Conen ([franz.conen@unibas.ch](mailto:franz.conen@unibas.ch))

- [acp-17-11065-2017-supplement-title-page.pdf](#)
- [Supplement.xls](#)

The copyright of individual parts of the supplement might differ from the CC BY 3.0 License.
