# Supplementary material for: Rainfall drives atmospheric ice-nucleating particles in the coastal climate of southern Norway
Source: Copernicus journal article supplement (doi:10.5194/acp-17-11065-2017), 2017-09-19
Supplement: Supplementary file 1 [file acp-17-11065-2017-supplement.zip › Supplement.xls]

## Sheet: Sheet1
Supplement of
Rainfall drives atmospheric ice-nucleating particles in the coastal climate of southern Norway
by F. Conen et al., 2017
Sampling period			INP-8			Precipitation	snow depth		Arabitol	Mannitol
Start	End		PM10	PM2.5
(date)			(m-3)			(mm)	(cm)		(ng m-3)
2013-09-25	2013-10-02		1.79576	0.568025		4.46667	0
2013-10-02	2013-10-09		2.24875	0.856969		28.35	0
2013-10-09	2013-10-16		1.61497	0.430328		5.16667	0
2013-10-16	2013-10-23		3.06988	1.85771		37.55	0
2013-10-23	2013-10-30		7.69606	3.68477		61.0833	0
2013-10-30	2013-11-06		7.46889	5.67312		55.2333	0
2013-11-06	2013-11-13		6.13975	3.50021		26.6333	0
2013-11-13	2013-11-20		6.8499	3.41073		20.7667	0
2013-11-20	2013-11-27		0.856969	0.296784		2.4	0
2013-11-27	2013-12-04		1.44126	0.95763		9.45	1.16667
2013-12-04	2013-12-11		3.68477	2.45802		34.3333	2.45833
2013-12-11	2013-12-18		3.50021	2.67768		37.8667	0.458333
2013-12-18	2013-12-25		10.1166	1.92053		130.717	0
2013-12-25	2014-01-01		3.87736			109.033	0
2014-01-01	2014-01-08		3.97689			153.067	0		2.11863	3.13197
2014-01-08	2014-01-15		2.45802			15.7	1.5		3.14623	3.90475
2014-01-15	2014-01-22		1.49841	0.856969		103.033	55.9583		0.770771	0.410963
2014-01-22	2014-01-29		0.614892	0.124766		53.7333	80.2917		0.387737	0.259708
2014-01-29	2014-02-05		0.521649	0.124766		81.6	102.958		0.95	0.733643
2014-02-05	2014-02-12		2.60325	1.21977		121.117	78.3333		1.35339	1.08093
2014-02-12	2014-02-19		0.710141	0.95763		109.283	66.5833		0.495126	0.707779
2014-02-19	2014-02-26		0.662261	0.907013		48.4	64.125		1.42027	1.25417
2014-02-26	2014-03-05		1.92053	0.521649		72.1167	44.3333		2.48716	2.24041
2014-03-05	2014-03-12		1.27411	0.907013		22.5	27.9167		1.78973	1.20906
2014-03-12	2014-03-19		1.00883	0.521649		8.68333	10.625		1.44395	1.31896
2014-03-19	2014-03-26		0.475753	0.614892		27.7833	0.916667		2.64596	2.8483
2014-03-26	2014-04-02		1.00883	0.340853		3.06667	0.0416667		2.07228	2.79304
2014-04-02	2014-04-09		3.97689	1.79576		33.55	0		2.20188	2.89949
2014-04-09	2014-04-16		0.521649	0.253149		7.11667	0		5.17906	6.58316
2014-04-16	2014-04-23		1.44126	0.340853		6.08333	0		8.73637	15.5031
2014-04-23	2014-04-30		0.662261	0.521649		0.683333	0		8.96803	16.6878
2014-04-30	2014-05-07		0.807483	0.807483		12.55	0		4.43725	5.3886
2014-05-07	2014-05-14		6.48061	2.45802		32.2	0		2.90765	3.93542
2014-05-14	2014-05-21		0.662261	0.253149		5.21667	0		4.61423	6.8458
2014-05-21	2014-05-28		1.38484	0.856969		5.5	0		4.17934	8.83009
2014-05-28	2014-06-04		0.662261	0.340853		0.966667	0		3.36899	5.42314
2014-06-04	2014-06-11		1.44126	0.710141		25.2167	0		5.15606	8.57748
2014-06-11	2014-06-18		0.568025	0.20994		0.15	0		6.6448	10.853
2014-06-18	2014-06-25		0.758545	0.253149		3.3	0		2.69832	4.27281
2014-06-25	2014-07-02		1.49841	0.614892		7.68333	0		4.91234	9.51422
2014-07-02	2014-07-09		1.92053	1.06063		46.8	0		8.21655	13.1369
2014-07-09	2014-07-16		0.614892	0.296784		12.7	0		4.72256	9.05651
2014-07-16	2014-07-23		0.710141	0		1.61667	0		3.92856	7.9459
2014-07-23	2014-07-30		1.27411	0.167148		9.06667	0		3.46456	5.44626
2014-07-30	2014-08-06		0.521649	0.614892		36.5833	0		3.33627	5.4138
2014-08-06	2014-08-13		3.78002	2.45802		100.933	0		6.01723	14.5914
2014-08-13	2014-08-20		7.2528	2.67768		38.1333	0		8.16783	17.5819
2014-08-20	2014-08-27		2.53004	0.95763		22.15	0		6.4147	10.3263
2014-08-27	2014-09-03		1.61497	0.758545		67.85	0		6.93487	12.604
2014-09-03	2014-09-10		2.60325	1.49841		103.033	0		7.86445	14.254
2014-09-10	2014-09-17		0.521649	0.167148		0.133333	0		8.86299	12.1991
2014-09-17	2014-09-24		0.296784	0.253149		2.36667	0		5.35739	10.5448
2014-09-24	2014-10-01		0.568025	0.253149		1.43333	0		10.6388	31.7353
2014-10-01	2014-10-08		1.00883	0.385364		56.1167	0		24.899	44.3597
2014-10-08	2014-10-15		7.2528	4.62618		131.6	0		17.8121	26.7692
2014-10-15	2014-10-22		4.74429	2.18113		66.6333	0		4.79074	13.577
2014-10-22	2014-10-29		4.62618	2.31741		72.6333	0		10.4893	18.6545
2014-10-29	2014-11-05		6.6614	2.38716		73.65	0		2.96761	15.4395
2014-11-05	2014-11-12		2.90881	1.32913		29.35	0		14.951	27.1281
2014-11-12	2014-11-19		4.86564	1.44126		71.0667	0		2.61178	13.0193
2014-11-19	2014-11-26		5.67312	2.67768		47.45	0		1.97507	3.23308
2014-11-26	2014-12-03		2.53004	0.807483		21.4833	1.04167		8.53364	12.818
2014-12-03	2014-12-10		7.69606	4.39901		28.5333	0.666667		4.63115	7.24635
2014-12-10	2014-12-17		8.18867	3.87736		50.5833	0.708333		1.78447	2.58022
2014-12-17	2014-12-24		9.37678	4.99041		16.4333	1.04167		3.61721	5.05874
2014-12-24	2014-12-31		0.253149	0		8.18333	6.875		0.0875271	0.16395
